## CORRECTION

Correction: Transcriptional profiling of Toll-like receptor 2-deficient primary murine brain cells during *Toxoplasma gondii* infection

Kousuke Umeda, Sachi Tanaka, Fumiaki Ihara, Junya Yamagishi, Yutaka Suzuki, Yoshifumi Nishikawa

The [Fig 3E and 3F](#) and [Fig 4E and 4F](#) are swapped in the [Fig 3](#) and [Fig 4](#). The current [Fig 3E and 3F](#) should be [Fig 4E and 4F](#) and vice versa. Please see the correct [Fig 3](#) and [Fig 4](#) here.

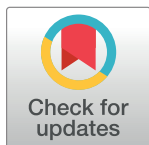

## OPEN ACCESS

**Citation:** Umeda K, Tanaka S, Ihara F, Yamagishi J, Suzuki Y, Nishikawa Y (2024) Correction: Transcriptional profiling of Toll-like receptor 2-deficient primary murine brain cells during *Toxoplasma gondii* infection. PLoS ONE 19(5): e0303453. <https://doi.org/10.1371/journal.pone.0303453>

**Published:** May 2, 2024

**Copyright:** © 2024 Umeda et al. This is an open access article distributed under the terms of the [Creative Commons Attribution License](#), which permits unrestricted use, distribution, and reproduction in any medium, provided the original author and source are credited.

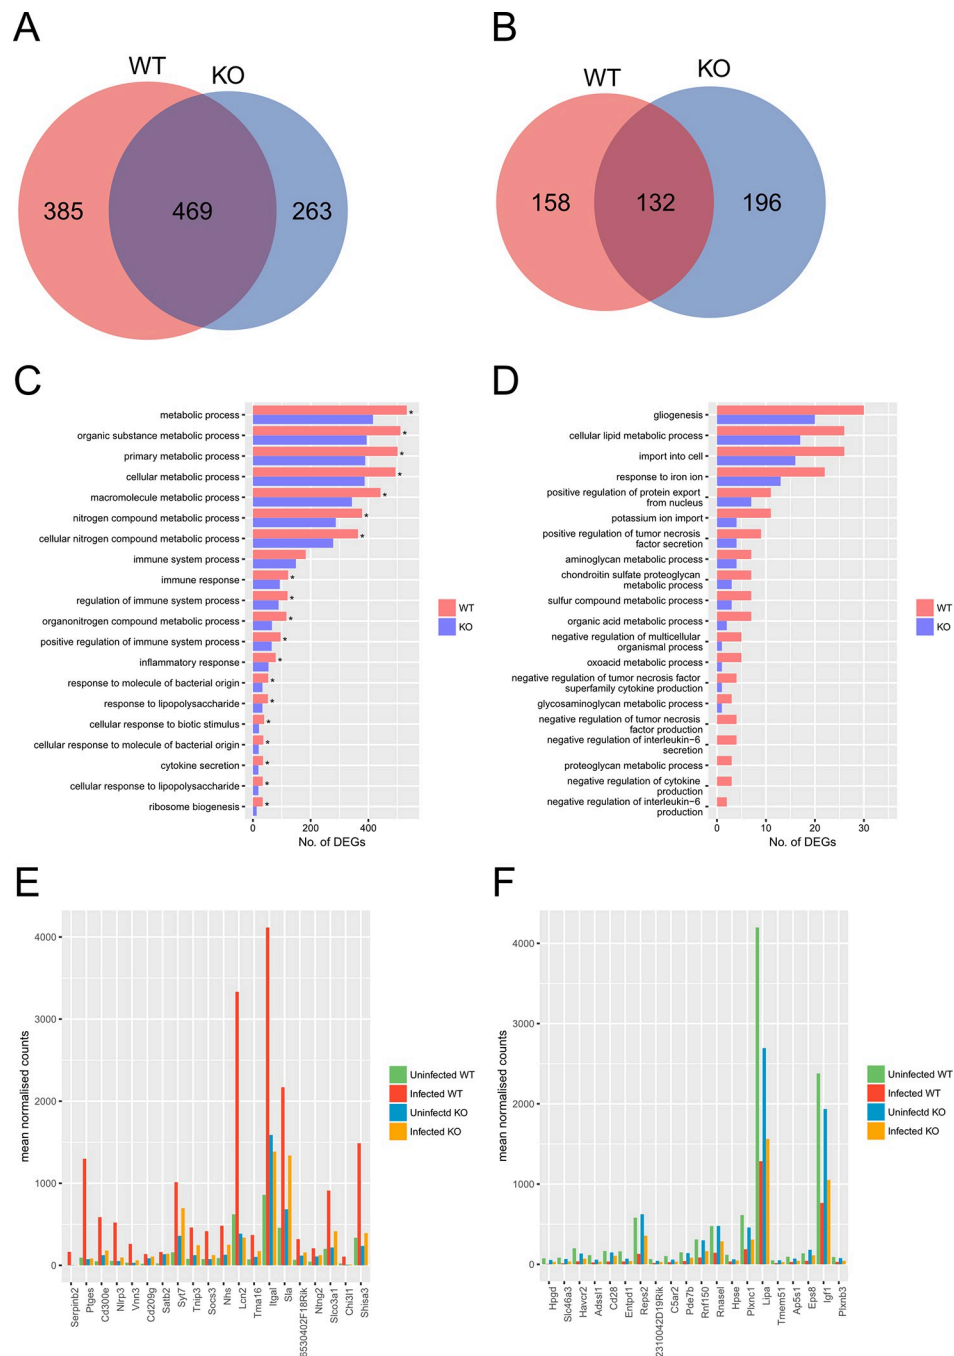

**Fig 3. Comparison of transcriptional profiles of *Tlr2*<sup>-/-</sup> and wild-type neurons during *T. gondii* infection.** Upregulated (A, C, E) and downregulated (B, D, F) genes were identified as genes with 2-fold change and < 0.05 FDR in DESeq analysis comparing infected and uninfected cells. (A, B) Venn diagrams comparing DEGs with increased and decreased abundance between *Tlr2*<sup>-/-</sup> and wild-type neurons. (C, D) To explore the function of DEGs analyzed in the Venn diagram, GO term enrichment analysis was performed. Asterisks represent significant differences with  $p < 0.05$  in Fisher's exact test. (E, F) Expression of top 20 genes highly upregulated or downregulated in a TLR2-dependent manner. TLR2-dependent DEGs were ranked according to fold-changes between infected and uninfected wild-type. WT, wild-type; KO, *Tlr2*<sup>-/-</sup>.

<https://doi.org/10.1371/journal.pone.0303453.g001>

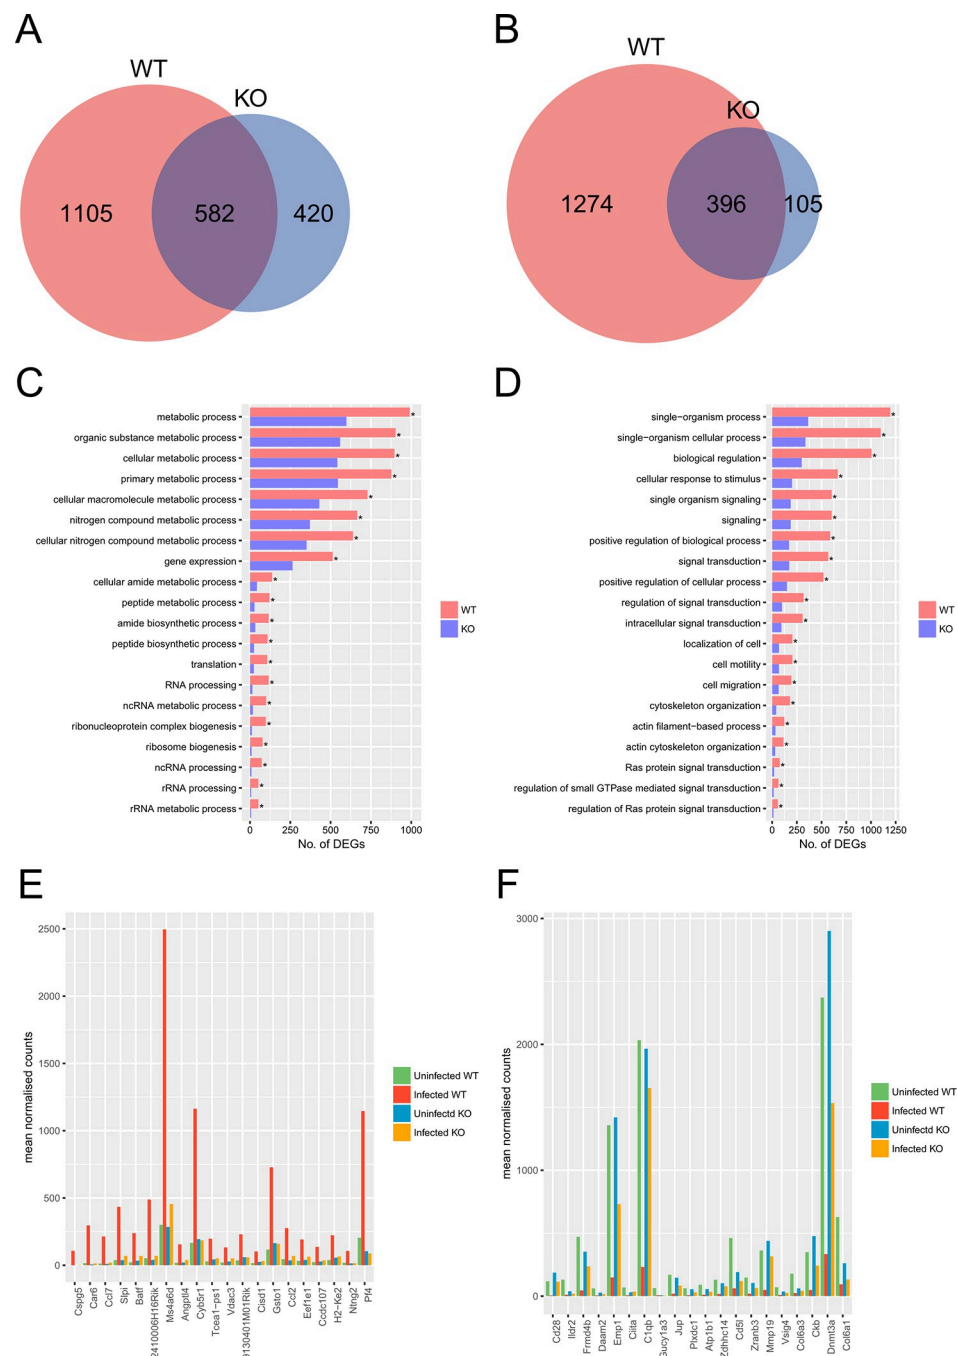

**Fig 4. Comparison of transcriptional profiles of *Tlr2*<sup>-/-</sup> and wild-type macrophages during *T. gondii* infection.** Upregulated (A, C, E) and downregulated (B, D, F) genes were identified as genes with 2-fold change and < 0.05 FDR in DESeq analysis comparing infected and uninfected cells. (A, B) Venn diagrams comparing DEGs with increased and decreased abundance between *Tlr2*<sup>-/-</sup> and wild-type macrophages. (C, D) To explore the function of DEGs analyzed in the Venn diagram, GO term enrichment analysis was performed. Asterisks represent significant differences with *p* < 0.05 in Fisher's exact test. (E, F) Expression of top 20 highly upregulated or downregulated TLR2-dependent genes. TLR2-dependent DEGs were ranked according to fold-changes between infected and uninfected wild-type. WT, wild-type; KO, *Tlr2*<sup>-/-</sup>.

<https://doi.org/10.1371/journal.pone.0303453.g002>

## Reference

1. Umeda K, Tanaka S, Ihara F, Yamagishi J, Suzuki Y, Nishikawa Y (2017) Transcriptional profiling of Toll-like receptor 2-deficient primary murine brain cells during *Toxoplasma gondii* infection. PLoS ONE 12(11): e0187703. <https://doi.org/10.1371/journal.pone.0187703>
